# Supplementary material for: Participation of women in the health workforce in the fragile and conflict-affected countries: a scoping review
Source: Springer Nature journal article supplement (doi:10.1186/s12960-021-00635-7), 2021-08-04
Supplement: MOESM2 [file 19542496]

**Harmonized List of Fragile Situations FY 18 a/**

| Country                  | WBG CPIA | AfDB or ADB CPIA | Harmonized Average | Peacekeeping Missions b/ | Political & Peacebuilding Missions c/ |
|--------------------------|----------|------------------|--------------------|--------------------------|---------------------------------------|
| <b>IDA Eligible</b>      |          |                  |                    |                          |                                       |
| Afghanistan              | 2.717    | 2.783            | 2.75               |                          | P                                     |
| Burundi                  | 2.975    | 3.113            | 3.04               |                          | P                                     |
| Central African Republic | 2.417    | 2.476            | 2.45               |                          | P                                     |
| Chad                     | 2.742    | 3.230            | 2.99               |                          |                                       |
| Comoros                  | 2.858    | 2.124            | 2.49               |                          |                                       |
| Congo, Dem. Rep.         | 2.917    | 3.246            | 3.08               | PK                       |                                       |
| Congo, Rep               | 2.850    | 3.281            | 3.07               |                          |                                       |
| Côte d'Ivoire            | 3.350    | 3.713            | 3.53               | PK                       |                                       |
| Djibouti                 | 2.967    | 3.298            | 3.13               |                          |                                       |
| Eritrea                  | 1.850    | 2.132            | 1.99               |                          |                                       |
| Gambia, The              | 2.925    | 2.943            | 2.93               | PK                       |                                       |
| Guinea-Bissau            | 2.458    | 2.628            | 2.54               |                          | P                                     |
| Haiti                    | 2.875    |                  | 2.88               | PK                       |                                       |
| Kiribati                 | 2.950    | 2.942            | 2.95               |                          |                                       |
| Kosovo                   | 3.567    |                  | 3.57               | PK                       |                                       |
| Liberia                  | 3.100    | 3.357            | 3.23               | PK                       |                                       |
| Mali                     | 3.358    | 3.741            | 3.55               | PK                       |                                       |
| Marshall Islands         | 2.600    | 2.875            | 2.74               |                          |                                       |
| Micronesia, Fed. Sts     | 2.750    | 2.883            | 2.82               |                          |                                       |
| Mozambique               | 3.233    | 3.165            | 3.20               |                          |                                       |
| Myanmar                  | 3.075    | 3.308            | 3.19               |                          |                                       |
| Papua New Guinea         | 3.000    | 2.858            | 2.93               |                          |                                       |
| Sierra Leone             | 3.242    | 3.312            | 3.28               |                          | P                                     |
| Solomon Islands          | 2.975    | 3.225            | 3.10               |                          |                                       |
| Somalia                  | 1.750    | 1.195            | 1.47               |                          | P                                     |
| South Sudan              | 1.575    | 1.858            | 1.72               | PK                       |                                       |
| Sudan                    | 2.467    | 2.560            | 2.51               | PK                       |                                       |
| Syria                    |          |                  |                    |                          |                                       |
| Togo                     | 3.025    | 3.188            | 3.11               |                          |                                       |
| Tuvalu                   | 2.858    | 3.017            | 2.94               |                          |                                       |
| Yemen, Rep.              | 2.383    |                  | 2.38               |                          |                                       |
| <b>Territories</b>       |          |                  |                    |                          |                                       |
| West Bank and Gaza       |          |                  |                    |                          | P                                     |
| <b>Blend</b>             |          |                  |                    |                          |                                       |
| Zimbabwe                 | 2.717    | 2.660            | 2.69               |                          |                                       |
| <b>IBRD Only</b>         |          |                  |                    |                          |                                       |
| Iraq                     |          |                  |                    |                          | P                                     |
| Lebanon                  |          |                  |                    |                          | P                                     |
| Libya                    |          |                  |                    |                          | P                                     |

a/ "Fragile Situations" have: either a) a harmonized average CPIA country rating of 3.2 or less, or b) the presence of a UN and/or regional peace-

b/ Specifically defined as the presence of a UN and/or regional (eg: AU, EU, OAS, NATO) peace-keeping operation in this country in the last three years, with the exclusion of border monitoring operations [sources: UN DPKO, AU, EC, websites] For additional information regarding this list, please read the FCS Information Note and FAQ found on our website: [www.worldbank.org/fragilityandconflict](http://www.worldbank.org/fragilityandconflict)

c/ Specifically defined as the presence of a UN and/or regional (eg: AU, EU, OAS) peace-building and political mission in this country in the last three years [sources: UN DPKO, AU, EU websites]

### Harmonized List of Fragile Situations FY 19 a/

| Country                  | WBG CPIA | ADB CPIA | AFDB CPIA | Harmonized Average | Peacekeeping Missions b/ | Political & Peacebuilding Missions c/ |
|--------------------------|----------|----------|-----------|--------------------|--------------------------|---------------------------------------|
| <b>IDA Eligible</b>      |          |          |           |                    |                          |                                       |
| Afghanistan              | 2.68     | 2.78     |           | 2.73               |                          | P                                     |
| Burundi                  | 2.91     |          | 3.11      | 3.01               |                          |                                       |
| Central African Republic | 2.48     |          | 2.48      | 2.48               |                          | P                                     |
| Chad                     | 2.66     |          | 3.23      | 2.94               |                          |                                       |
| Comoros                  | 2.81     |          | 2.12      | 2.46               |                          |                                       |
| Congo, Dem. Rep.         | 2.83     |          | 3.25      | 3.04               | PK                       |                                       |
| Congo, Rep               | 2.70     |          | 3.28      | 2.99               |                          |                                       |
| Côte d'Ivoire            | 3.38     |          | 3.71      | 3.54               | PK                       |                                       |
| Djibouti                 | 2.97     |          | 3.30      | 3.13               |                          |                                       |
| Eritrea                  | 1.85     |          | 2.13      | 1.99               |                          |                                       |
| Gambia, The              | 2.97     |          | 2.94      | 2.95               | PK                       |                                       |
| Guinea-Bissau            | 2.45     |          | 2.63      | 2.54               |                          | P                                     |
| Haiti                    | 2.88     |          |           | 2.88               | PK                       |                                       |
| Kiribati                 | 2.99     | 2.94     |           | 2.97               |                          |                                       |
| Kosovo                   | 3.57     |          |           | 3.57               | PK                       |                                       |
| Liberia                  | 3.13     |          | 3.36      | 3.24               | PK                       |                                       |
| Mali                     | 3.40     |          | 3.74      | 3.57               | PK                       |                                       |
| Marshall Islands         | 2.60     | 2.88     |           | 2.74               |                          |                                       |
| Micronesia, Fed. Sts     | 2.75     | 2.88     |           | 2.82               |                          |                                       |
| Mozambique               | 3.17     |          | 3.16      | 3.16               |                          |                                       |
| Myanmar                  | 3.00     | 3.31     |           | 3.15               |                          |                                       |
| Solomon Islands          | 2.93     | 3.23     |           | 3.08               |                          |                                       |
| Somalia                  |          |          |           |                    |                          | P                                     |
| South Sudan              | 1.53     |          | 1.86      | 1.69               | PK                       |                                       |
| Sudan                    | 2.38     |          | 2.56      | 2.47               | PK                       |                                       |
| Syria                    |          |          |           |                    |                          |                                       |
| Togo                     | 3.13     |          | 3.19      | 3.16               |                          |                                       |
| Tuvalu                   | 2.90     | 3.02     |           | 2.96               |                          |                                       |
| Yemen, Rep.              | 2.11     |          |           | 2.11               |                          |                                       |
| <b>Territories</b>       |          |          |           |                    |                          |                                       |
| West Bank and Gaza       |          |          |           |                    |                          | P                                     |
| <b>Blend</b>             |          |          |           |                    |                          |                                       |
| Papua New Guinea         | 2.96     | 2.86     |           | 2.91               |                          |                                       |
| Timor-Leste              | 2.85     | 3.46     |           | 3.15               |                          |                                       |
| Zimbabwe                 | 2.78     |          | 2.66      | 2.72               |                          |                                       |
| <b>IBRD Only</b>         |          |          |           |                    |                          |                                       |
| Iraq                     |          |          |           |                    |                          | P                                     |
| Lebanon                  |          |          |           |                    |                          | P                                     |
| Libya                    |          |          |           |                    |                          | P                                     |

a/ "Fragile Situations" have: either a) a harmonized average CPIA country rating of 3.2 or less, or b) the presence of a UN and/or regional peace-keeping or peace-building mission during the past three years. This list includes only IDA eligible countries and non-member or inactive territories/countries without CPIA data. IBRD countries with CPIA ratings below 3.200 do not qualify on this list due to non disclosure of CPIA ratings; IBRD countries that are included here qualify only by the presence of a peacekeeping, political or peace-building mission - and their CPIA ratings are thus not quoted here

b/ Specifically defined as the presence of a UN and/or regional (eg: AU, EU, OAS, NATO) peace-keeping operation in this country in the last three years, with the exclusion of border monitoring operations [sources: UN DPKO, AU, EC, websites] For additional information regarding this list, please read the FCS Information Note and FAQ found on our website: [www.worldbank.org/fragilityandconflict](http://www.worldbank.org/fragilityandconflict)

c/ Specifically defined as the presence of a UN and/or regional (eg: AU, EU, OAS) peace-building and political mission in this country in the last three years [sources: UN DPKO, AU, EU websites]
